# Supplementary material for: Single-Walled Carbon Nanotubes Inhibit the Cytochrome P450 Enzyme, CYP3A4
Source: PubMed Central journal article supplement (PMC4761960; doi:10.1038/srep21316), 2016-02-22
Supplement: srep21316-s1.pdf [file srep21316-s1.pdf]

## Supporting information

### Single-Walled Carbon Nanotubes Inhibit the Cytochrome P450 Enzyme, CYP3A4

*Ramy El-Sayed,<sup>1</sup> Kunal Bhattacharya,<sup>1</sup> Zonglin Gu,<sup>2</sup> Zaixing Yang,<sup>2</sup> Jeffrey K. Weber,<sup>3</sup> Hu Li,<sup>4</sup> Klaus Leifer,<sup>4</sup> Yichen Zhao,<sup>5</sup> Muhammet S. Toprak,<sup>5</sup> Ruhong Zhou,<sup>2,3,6</sup> and Bengt Fadeel<sup>1,7</sup>*

<sup>1</sup>Nanosafety & Nanomedicine Laboratory, Division of Molecular Toxicology, Institute of Environmental Medicine, Karolinska Institutet, 17177 Stockholm, Sweden; <sup>2</sup>Institute of Quantitative Biology and Medicine, Collaborative Innovation Center of Radiation Medicine of Jiangsu Higher Education Institutions, Soochow University, Suzhou 215123, China; <sup>3</sup>IBM Thomas J. Watson Research Center, Yorktown Heights, New York 10598, USA; <sup>4</sup>Department of Engineering Sciences, Uppsala University, 75121 Uppsala, Sweden; <sup>5</sup>Functional Materials Division, Department of Materials and Nanophysics, KTH-Royal Institute of Technology, 16440 Stockholm, Sweden; <sup>6</sup>Department of Chemistry, Columbia University, New York, New York 10027, USA; <sup>7</sup>Department of Environmental and Occupational Health, University of Pittsburgh, Pittsburgh, Pennsylvania 15219, USA. **Correspondence:** [bengt.fadeel@ki.se](mailto:bengt.fadeel@ki.se); or [ruhongz@us.ibm.com](mailto:ruhongz@us.ibm.com).

**Supplementary Table 1** – physicochemical characterization of the SWCNTs.

|                 | <b>Length (nm)</b> | <b>Zeta potential (mV)</b> |
|-----------------|--------------------|----------------------------|
| c-SWCNTs        | 179 ± 100          | -61.2                      |
| BSA@c-SWCNTs    |                    | -16.0                      |
| PEG750@c-SWCNTs |                    | -46.5                      |
| PEG5K@c-SWCNTs  |                    | -50.2                      |
| PEG10K@c-SWCNTs |                    | -36.2                      |

Size was determined based on TEM images (n=100). Zeta potential of CNTs at 25°C in milli-Q H<sub>2</sub>O.

**Supplementary Table 2.**

| <b>Model</b> | <b>Contacting residues and contact ratio</b>                           |
|--------------|------------------------------------------------------------------------|
| <b>2</b>     | run1 Lys35 (75.10%), Asn104 (19.30%), Lys378 (45.80%), Lys379 (52.50%) |
|              | run2 Ser29 (81.90%), Lys34 (64.20%), Lys35 (67.90%), Gln78 (78.20%)    |
|              | run3 His28 (33.10%), Lys35 (81.70%), Lys390 (57.00%)                   |
| <b>3</b>     | run1 Lys251 (90.41%), Lys254 (79.04%)                                  |
|              | run2 Arg243 (25.30%), Lys251 (48.90%)                                  |
|              | run3 His28 (90.80%), Ser29 (62.70%), Lys35 (47.80%)                    |

**Supplementary Table 3.**

| <b>Model 1</b> | <b>Contacting residues and formation of <math>\pi</math>-<math>\pi</math> stacking (time ratio)</b> |
|----------------|-----------------------------------------------------------------------------------------------------|
| run 1          | Phe46 (69.92%), Phe228 (54.92%)                                                                     |
| run 2          | Phe113 (86.50%), Phe228 (50.50%)                                                                    |
| run 3          | Phe228 (96.67%)                                                                                     |

## Supplementary Movies

**Movie M1.** MD simulation of Model 1 (consult main text). The animation shows an independent run [run 1, side view] of the adsorption process of CYP3A4 to the surface of c-SWCNT.

**Movie M2.** MD simulation of Model 1 (consult main text). The animation shows an independent run [run 1, top view] of the adsorption process of CYP3A4 to the surface of c-SWCNT.

**Movie M3.** MD simulation of Model 1 (consult main text). The animation shows an independent run [run 2, side view] of the adsorption process of CYP3A4 to the surface of c-SWCNT.

**Movie M4.** MD simulation of Model 1 (consult main text). The animation shows an independent run [run 2, top view] of the adsorption process of CYP3A4 to the surface of c-SWCNT.

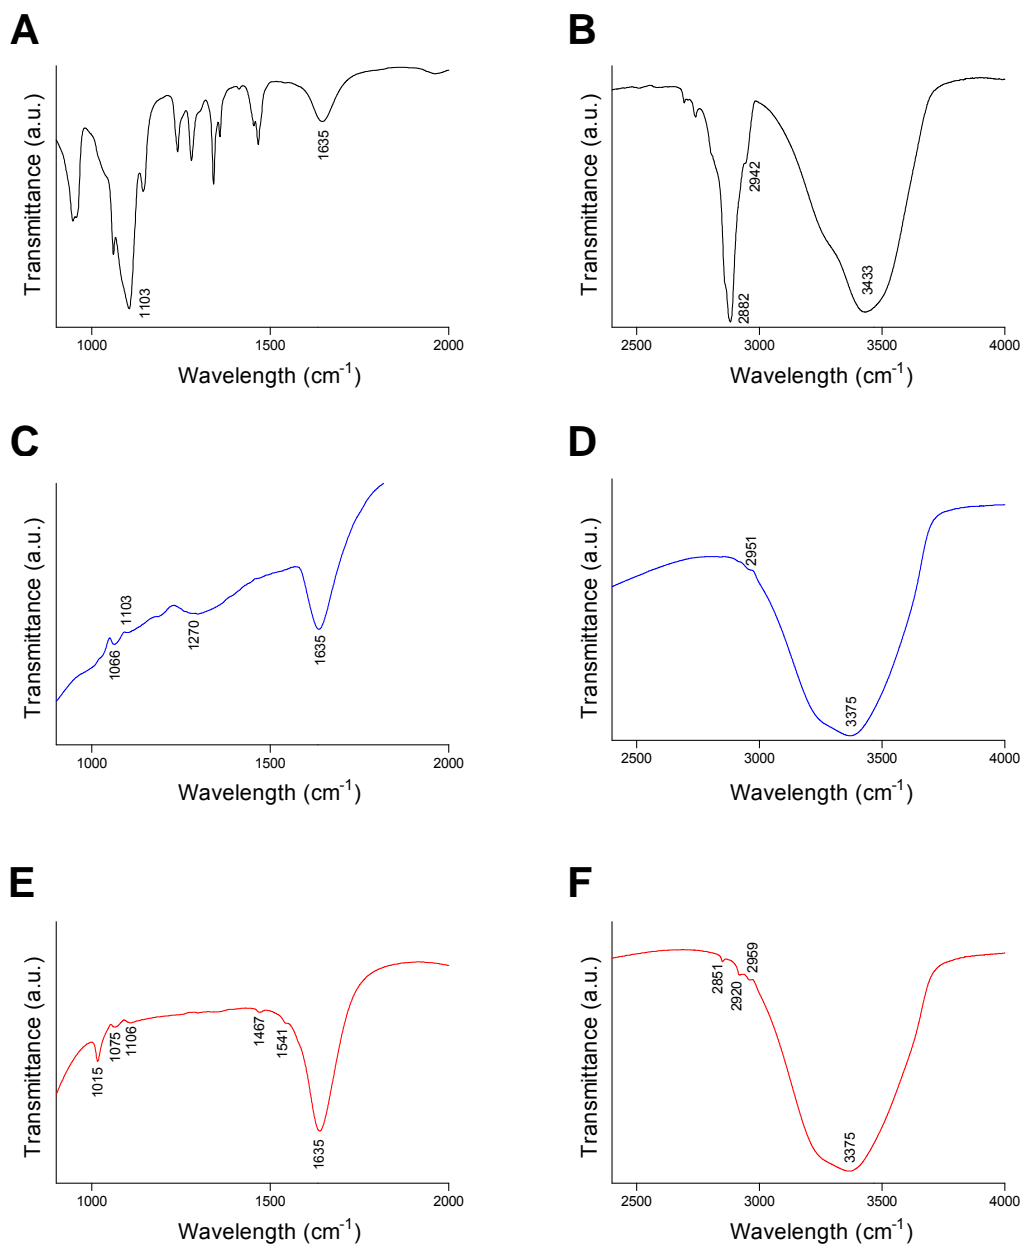

**Figure S1.** Fourier Transform Infrared (FTIR) spectra in two spectral regions, between 900-2000  $\text{cm}^{-1}$  and 2400-4000  $\text{cm}^{-1}$ , are shown for (a, b) methyl-terminated poly(ethylene) glycol (PEG); (c, d) oxidized SWCNTs; and (e, f) PEG functionalized ox-SWCNTs. The spectrum of pure PEG is characterized by the stretching vibration of the

C–H at  $2882\text{ cm}^{-1}$ , the C=O stretching vibration at  $1635\text{ cm}^{-1}$ , the O–H bending vibration at  $1385\text{ cm}^{-1}$ , the deformation vibration of the C–H bonds at  $1468$  and  $1342\text{ cm}^{-1}$ , the bending vibration of the O–H at  $1280$  and  $1242\text{ cm}^{-1}$  and the C–O stretching vibration at  $1149\text{ cm}^{-1}$ . FTIR spectra showed C–O stretching bands at  $1066$  and  $1270\text{ cm}^{-1}$  for c-SWCNTs and at  $1075\text{ cm}^{-1}$  for PEG functionalized c-SWCNTs (PEG-c-SWCNTs). The results also showed C–O–C bond stretching at  $1103\text{ cm}^{-1}$  for c-SWCNTs and  $1106\text{ cm}^{-1}$  for PEG-c-SWCNTs. Additionally, the PEG-c-SWCNTs showed peaks for interplanar stretching of aromatic rings at  $1015\text{ cm}^{-1}$  and C–O–H bond stretching peak of carboxylic acid at  $1467\text{ cm}^{-1}$ . Presence of the aforementioned bonds confirmed extensive carboxylation on the surface of the c-SWCNTs and PEG-c-SWCNTs. Attachment of PEG on the surface of the c-SWCNTs was done through the process of amidation representing covalent attachment (peptide bond) of PEG onto the surface of the c-SWCNTs. We observed the presence of Amide II bond peak in the PEG-SWCNTs FTIR spectrum at  $1541\text{ cm}^{-1}$  representing the overlap of the N–H bending and C–N stretching vibration and confirming the covalent attachment of the PEG chain to the surface of the c-SWCNTs. Furthermore, the  $1541\text{ cm}^{-1}$  peak was absent in both the PEG only and ox-SWCNTs spectra. Presence of the 5kDa PEG chains on the surface of the PEG-c-SWCNTs was further verified through the detection of the PEG characteristic methylene C–H stretch peaks present at  $2882$  and  $2942\text{ cm}^{-1}$ , in PEG-SWCNTs spectrum at  $2837$  and  $2914\text{ cm}^{-1}$  representing symmetric and asymmetric  $\text{CH}_2$  stretching, respectively.  $\text{CH}_3$  asymmetric stretching peaks were also observed in the ox-SWCNTs and PEG-SWCNTs spectra at  $2951$  and  $2959\text{ cm}^{-1}$ , respectively representing the backbone structure of the SWCNTs. Since all the samples were suspended in distilled water, two characteristic peaks of  $\text{H}_2\text{O}$ , *i.e.*, H–O–H scissor at  $1635\text{ cm}^{-1}$  and OH stretching at  $3433$

$\text{cm}^{-1}$  (PEG) and  $3375 \text{ cm}^{-1}$  (c-SWCNTs and 5kDa PEG-c-SWCNTs) were found in all samples.

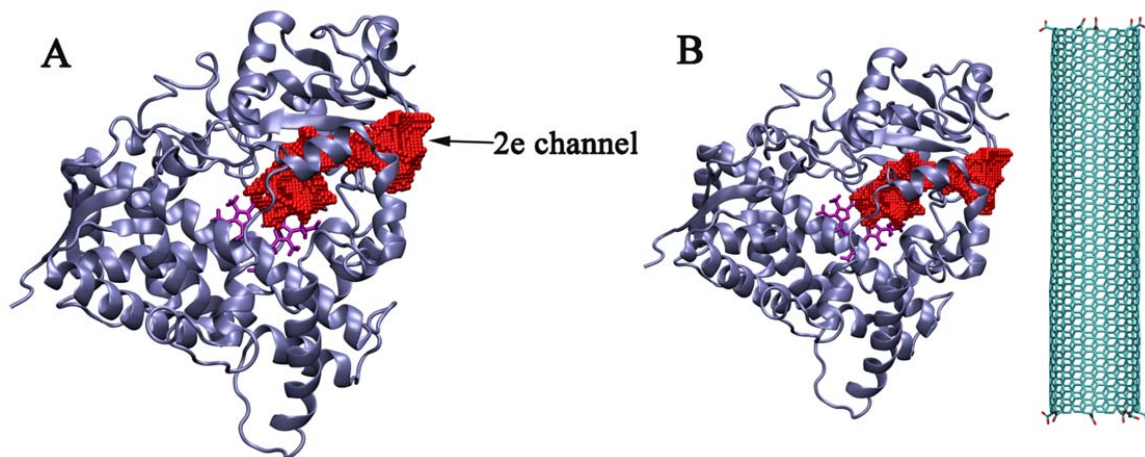

**Figure S2.** CYP3A4 (a) is shown with secondary structure colored in blue and the 2e channel is illustrated with red van der Waals (vdW) balls. (b) The initial configuration of Model 1 is shown.



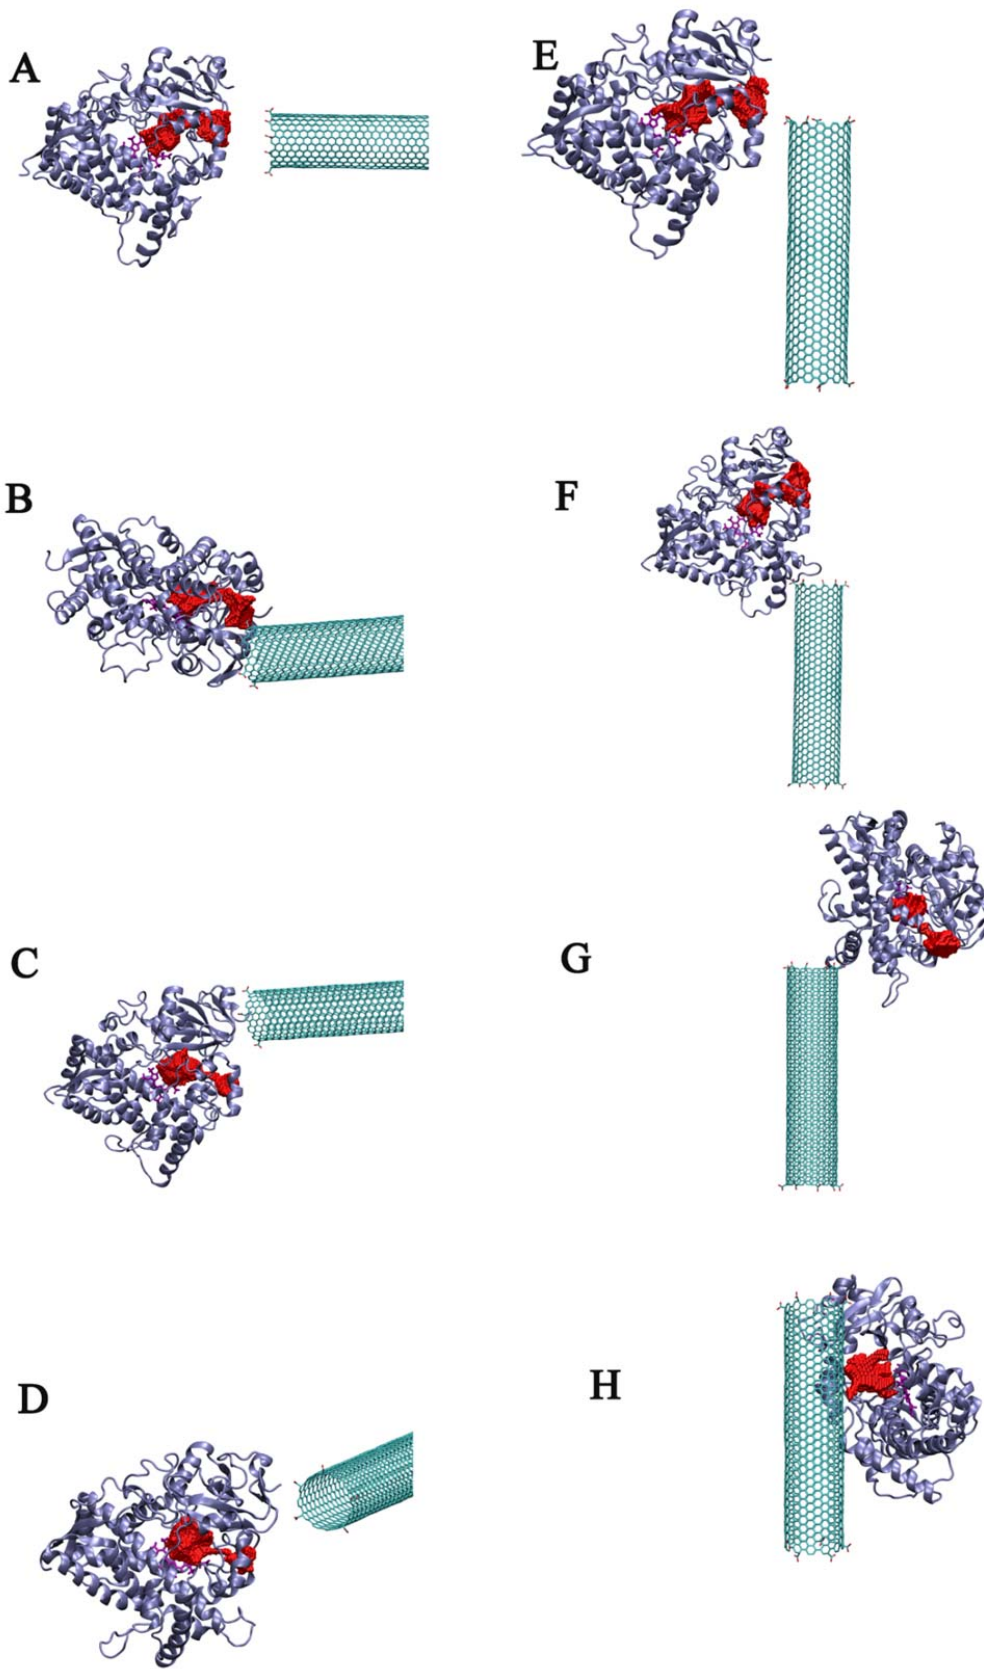

**Figure S3.** Two other molecular dynamics models (Model 2 and Model 3) with different initial configurations (each running for three independent trajectories). The initial configurations with c-SWCNT heading directly to the 2e channel (Model 2; a) and the c-SWCNT edge approaching the 2e channel from side (Model 3; e) are shown. The last frames of two configurations running for 100 ns are shown (b-d, f-h). Wherein, the active center is shown by purple sticks and the 2e channel is indicated with some red vdW balls.

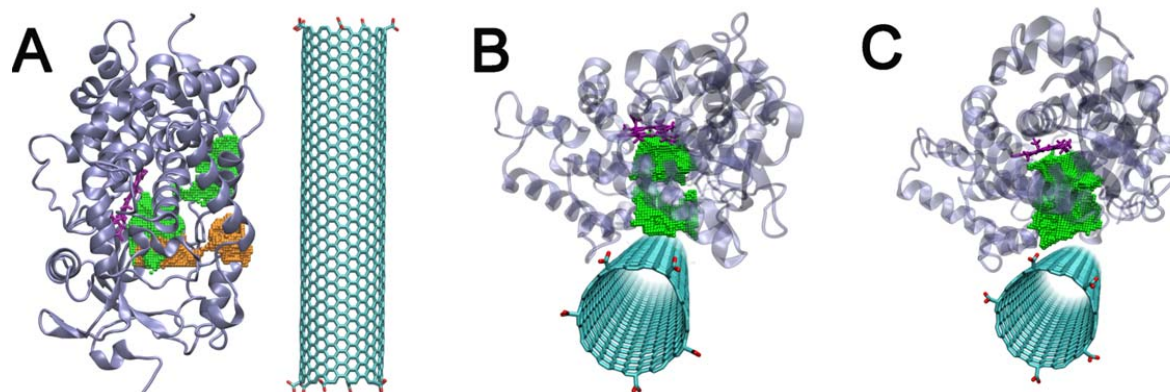

**Figure S4.** Model 4 with the c-SWCNT faced to the 3 (orange vdW balls) and S (green vdW balls) channels. The initial setup (a) and the two final snapshots (b and c) at  $t = 120$  ns from two independent trajectories. The entrance for the 3 channel is shown with orange surface.

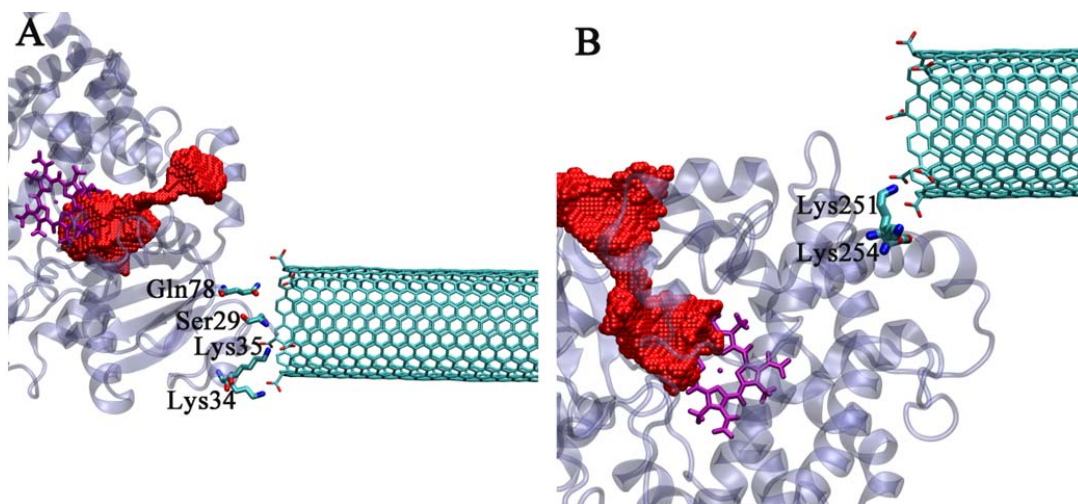

**Figure S5.** Two representative local snapshots of two trajectories chosen from Model 2 (a) and Model 3 (b). The key binding residues (hydrophilic and basic residues) in CYP3A4 are shown.

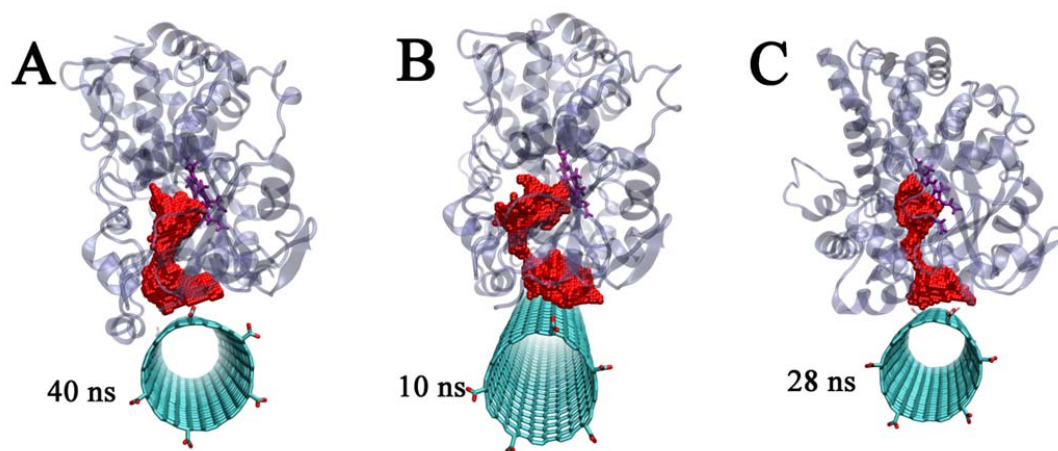

**Figure S6.** MD simulations of c-SWCNT and CYP3A4. (a-c) The timescale for the start of the 2e channel blocking by the c-SWCNT in all the three independent runs of Model 1. Once blocked, the 2e channel will keep the blocked state unchanged until the end of the simulation.

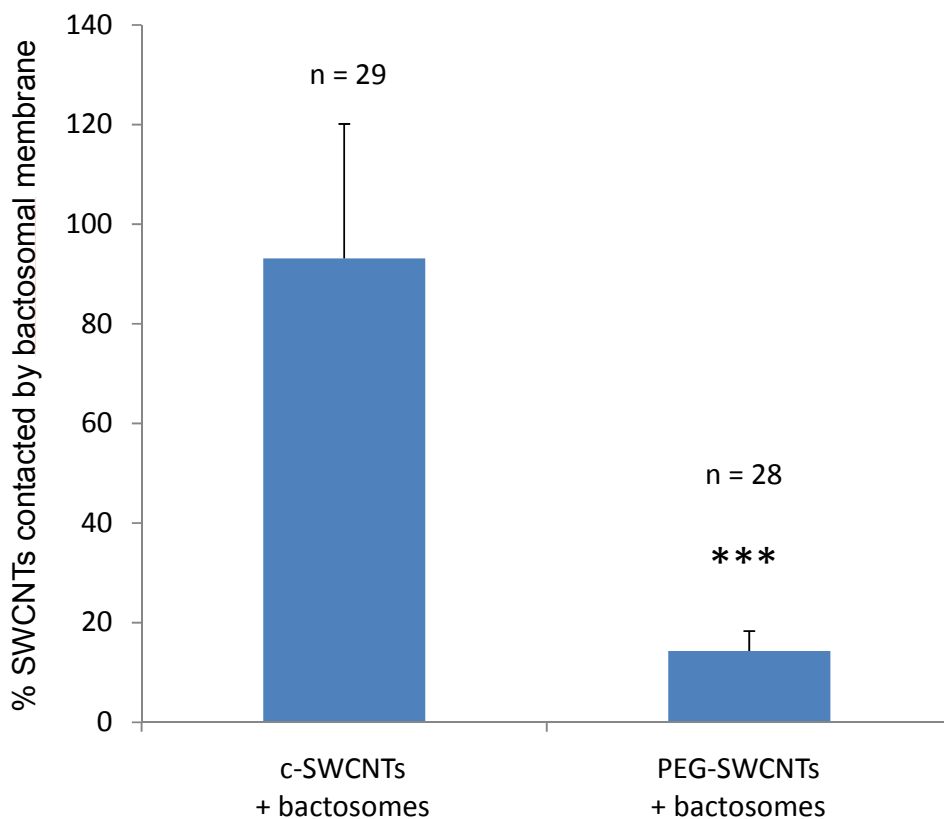

**Figure S7.** Effect of PEGylation on protein interactions. CYP3A4 interaction with the side-wall of the c-SWCNTs and PEG 5kDa-c-SWCNTs is presented as 'percentage of SWCNTs covered by bactosomal membrane'. The percentage was calculated using treated *versus* untreated samples (refer to AFM images depicted in Fig. 6). Statistical analysis to demonstrate differences in CYP3A4 binding to the side-walls of c-SWCNTs and PEG 5kDa-c-SWCNTs was performed using unpaired Students t-test (\*\*\*) p value <0.001).
